# Supplementary material for: Parental breeding age effects on descendants’ longevity interact over 2 generations in matrilines and patrilines
Source: PLoS Biol. 2019 Nov 25;17(11):e3000556. doi: 10.1371/journal.pbio.3000556 (PMC6901263; doi:10.1371/journal.pbio.3000556)
Supplement: S3 Table — Negative effects for F1 larval diet indicate that grandparents reared on a high-nutrient larval diet produced grand-offspring with a relatively longer life span than descendants of grandparents reared on a low-nutrient larval diet. Negative effects of F1 and F2 age indicate that old grandparents and parents produced F3 individuals with reduced lifespans, negative effects of larval diet indicate that low-nutrient larval diet has a negative effect on F3 life span, and negative effects of sex indicate that the life span of male descendants was lower than that of females. Significance codes: p = 0.0001 ‘***’, p = 0.001 ‘**’, p = 0.01 ‘*’, p = 0.05 ‘.’, p = 0.1. F1, grand-parental generation; F2, female and male offspring; F3, grand-offspring (XLSX) [file pbio.3000556.s010.xlsx]

## Sheet: Sheet1
Effects on F3 lifespan
Fixed effects:	Estimate	SE
(Intercept)	83.072	6.989***
F1 Larval diet	-8.718	4.596.
F1 Age	-22.536	5.236***
F2 Sex	8.383	5.366
F2 Age	-0.946	0.155***
F3 Sex	-18.023	4.365***
F1 Competitive environment	-1.739	1.257
F1 Age ´ F2 Age	0.266	0.112*
F1 Larval diet ´ F1 Age	3.621	3.439
F1 Larval diet ´ F2 Sex	-1.53	3.005
F1 Age ´ F2 Sex	-0.208	3.216
F2 Sex ´ F2 Age	-0.209	0.103*
F1 Age ´ F3 Sex	3.827	2.733
F2 Sex ´ F3 Sex	-3.783	2.621
F2 Age ´ F3 Sex	0.119	0.079
F1 Larval diet ´ F3 Sex	4.718	2.502.
