# Supplementary material for: Parental breeding age effects on descendants’ longevity interact over 2 generations in matrilines and patrilines
Source: PLoS Biol. 2019 Nov 25;17(11):e3000556. doi: 10.1371/journal.pbio.3000556 (PMC6901263; doi:10.1371/journal.pbio.3000556)
Supplement: S6 Table — F1, grand-parental generation (XLSX) [file pbio.3000556.s013.xlsx]

## Sheet: Sheet1
Parameter	Treatment group	Est.	Lower 95% CI	Upper 95% CI	Serial autocorrelation
b0	F1 High nutrient diet Young breeding age (HY)	-4.401	-4.681	-4.121	0.003
	F1 High nutrient diet Old breeding age (HO)	-3.503	-4.186	-2.888	-0.008
	F1 Low nutrient diet Young breeding age (LY)	-4.17	-4.406	-3.931	-0.013
	F1 Low nutrient diet Old breeding age (LO)	-3.56	-3.851	-3.274	0.009
b1	F1 High nutrient diet Young breeding age (HY)	0.032	0.025	0.039	0.021
	F1 High nutrient diet Old breeding age (HO)	0.032	0.003	0.061	0.01
	F1 Low nutrient diet Young breeding age (LY)	0.029	0.022	0.035	-0.032
	F1 Low nutrient diet Old breeding age (LO)	0.036	0.024	0.048	0.003
