# Supplementary material for: Parental breeding age effects on descendants’ longevity interact over 2 generations in matrilines and patrilines
Source: PLoS Biol. 2019 Nov 25;17(11):e3000556. doi: 10.1371/journal.pbio.3000556 (PMC6901263; doi:10.1371/journal.pbio.3000556)
Supplement: S11 Table — KLDC, Kullback-Leibler discrepancy calibration (XLSX) [file pbio.3000556.s018.xlsx]

## Sheet: Sheet1
Comparison	b0	b1
F1 Young breeding age F2 Old breeding age (YO) - F1 Young breeding age F2 Young breeding age (YY)	1	0.977
F1 Young breeding age F2 Very Old breeding age (YVO) - F1 Young breeding age F2 Young breeding age (YY)	1	1
F1 Young breeding age F2 Very Old breeding age (YVO) - F1 Young breeding age F2 Old breeding age (YO)	1	1
F1 Old breeding age F2 Young breeding age (OY) - F1 Young breeding age F2 Young breeding age (YY)	0.988	0.862
F1 Old breeding age F2 Young breeding age (OY) - F1 Young breeding age F2 Old breeding age (YO)	0.806	0.949
F1 Old breeding age F2 Young breeding age (OY) - F1 Young breeding age F2 Very Old breeding age (YVO)	1	1
F1 Old breeding age F2 Old breeding age (OO) - F1 Young breeding age F2 Young breeding age (YY)	1	0.992
F1 Old breeding age F2 Old breeding age (OO) - F1 Young breeding age F2 Old breeding age (YO)	1	0.925
F1 Old breeding age F2 Old breeding age (OO) - F1 Young breeding age F2 Very Old breeding age (YVO)	0.934	0.974
F1 Old breeding age F2 Old breeding age (OO) - F1 Old breeding age F2 Young breeding age (OY)	1	0.985
F1 Old breeding age F2 Very Old breeding age (OVO) - F1 Young breeding age F2 Young breeding age (YY)	1	0.967
F1 Old breeding age F2 Very Old breeding age (OVO) - F1 Young breeding age F2 Old breeding age (YO)	1	0.993
F1 Old breeding age F2 Very Old breeding age (OVO) - F1 Young breeding age F2 Very Old breeding age (YVO)	0.977	1
F1 Old breeding age F2 Very Old breeding age (OVO) - F1 Old breeding age F2 Young breeding age (OY)	0.998	0.789
F1 Old breeding age F2 Very Old breeding age (OVO) - F1 Old breeding age F2 Old breeding age (OO)	0.617	0.999
